# Supplementary material for: Paradox of Nonpathogenicity and Cytopathic Effects：Characterization of Regulator Tas in Foamy Virus Evolution and De-Ubiquitylation of Tas in Virus Duplication
Source: Research Square preprint supplement (doi:10.21203/rs.3.rs-561811/v1), 2021-06-15
Supplement: Supplementary file 1 [file aa65b3bee91c27d2c3b23d99.docx]

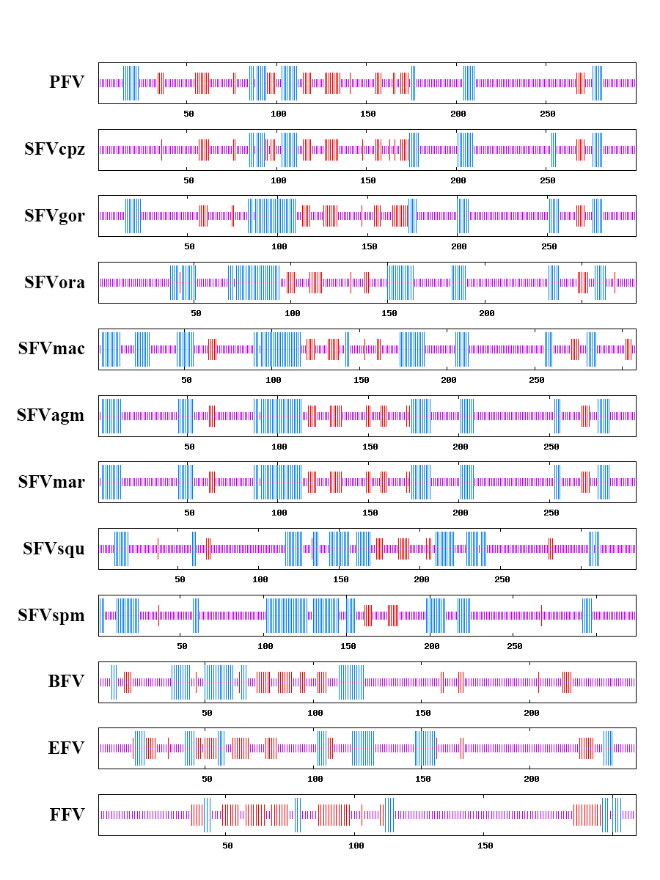


**supplementary material 2:** The secondary structure predictions of different kinds of Tas sequences. The blue bars indicatedα-helix, the red bars indicated random coil, and the purple bars indicated β-corner appears in local regions.
